# Supplementary material
Source: HighWire-hosted journal article supplement (https://www.jrheum.org/highwire/filestream/41617/field_highwire_adjunct_files/0/210938DataSuppl.pdf)
Supplement: 210938DataSuppl.pdf [file 210938DataSuppl.pdf]

**Supplemental Table 1: Diagnosis codes for MSDs\***

| Condition Groupings |                                                       | Ambulatory Care:<br>OHIP diagnosis codes<br>(ICD-9 based)†     | Hospital Care: ICD-10<br>diagnosis codes‡                                                                                   |
|---------------------|-------------------------------------------------------|----------------------------------------------------------------|-----------------------------------------------------------------------------------------------------------------------------|
| <b>ALL<br/>MSD</b>  | <b>Trauma and related conditions, excluding spine</b> |                                                                |                                                                                                                             |
|                     | Fracture/dislocation                                  | 807, 808, 810, 812-816, 821, 823, 824, 829, 831, 832, 834, 839 | S43.0-S43.3, S53.0-S53.3, S63.0-S63.4, S73.0, S83.0-S83.1, S93.0-S93.3, S42, S52, S62, S72, S82, S92, T02.2-T02.6, T10, T12 |
|                     | Strains/sprains                                       | 840, 842, 844, 845, 848                                        | S43.4-S43.7, S53.4, S63.5-S63.7, S73.1, S83.2-S83.7, S93.4-S93.6                                                            |
|                     | Dislocations/sprains/strains                          | N/A                                                            | T03.2-T03.4, T11.2, T13.2                                                                                                   |
|                     | Joint derangement                                     | 718                                                            | M22-M24                                                                                                                     |
|                     | <b>All spinal conditions</b>                          |                                                                |                                                                                                                             |
|                     | Non-trauma spine                                      | 721, 722, 724, 737                                             | M40-M43, M47, M49-M54, M48.0-M48.3, M48.8-M48.9                                                                             |
|                     | Strains/sprains                                       | 847                                                            | S13.4-S13.5, S23.3, S33.5-S33.7                                                                                             |
|                     | Fracture/dislocation                                  | 805, 806                                                       | S13.0-S13.3, S23.0-S23.2, S33.0-S33.3, S12, S22.1, S32, T02.1, T02.7, T08,                                                  |
|                     | Dislocations/sprains/strains                          | N/A                                                            | T03.1                                                                                                                       |
|                     | <b>Arthritis and related conditions</b>               |                                                                |                                                                                                                             |
|                     | Rheumatoid Arthritis                                  | 714                                                            | M05 - M09                                                                                                                   |
|                     | Ankylosing spondylitis                                | 720                                                            | M45, M46                                                                                                                    |
|                     | Connective tissue                                     | 710                                                            | M30-M36                                                                                                                     |
|                     | Osteoarthritis                                        | 715                                                            | M15-M19                                                                                                                     |
|                     | Synovitis                                             | 727                                                            | M65-M71                                                                                                                     |
|                     | Traumatic arthritis                                   | 716                                                            | M00-M03, M12                                                                                                                |
|                     | Gout                                                  | 274                                                            | M10, M11, M14                                                                                                               |
|                     | Soft tissue disorders                                 | 728,729                                                        | M60-M63, M72-M73, M75-M77, M79                                                                                              |
|                     | Other arthritis                                       | 739                                                            | M13, M96, M99                                                                                                               |
|                     | <b>Bone Conditions</b>                                | 730-735                                                        | M80-M90, M91-M94, M48.4, M48.5, M20, M21.4                                                                                  |
|                     | <b>Unspecified MSD</b>                                | 781                                                            | M21 (excluding. M21.4), M25                                                                                                 |

\* MSD = Musculoskeletal Disorders

† The classification scheme used in the OHIP database is based on a subset of 3-digit codes adapted from the International Classification of Diseases, 9<sup>th</sup> Revision (ICD-9). OHIP claims include only a single diagnosis code per physician visit.

‡ Databases for hospital care (The Discharge Abstract Database, National Ambulatory Care Reporting System database) use the full range of diagnosis codes from the ICD-10. The “most responsible diagnosis” was used to identify care for MSD.
